# Supplementary material for: Early ontogeny social deprivation modifies future agonistic behaviour in crayfish
Source: PubMed Central journal article supplement (PMC6427012; doi:10.1038/s41598-019-41333-8), 2019-03-20
Supplement: 41598_2019_41333_MOESM1_ESM.pdf [file 41598_2019_41333_MOESM1_ESM.pdf]

## Early ontogeny social deprivation modifies future agonistic behaviour in crayfish

Jiří Patoka, Lukáš Kalous, Luděk Bartoš

**Table S1. Total numbers of agonistic encounters according day and group type (ES = early separated, MI = maternally incubated, Mix = mixed group).**

| <b>Day</b> | <b>Group type</b> | <b>N</b>    |
|------------|-------------------|-------------|
| 1          | ES                | 447         |
| 1          | MI                | 332         |
| 1          | Mix               | 302         |
| 4          | ES                | 686         |
| 4          | MI                | 665         |
| 4          | Mix               | 499         |
| 7          | ES                | 537         |
| 7          | MI                | 488         |
| 7          | Mix               | 367         |
| 10         | ES                | 642         |
| 10         | MI                | 472         |
| 10         | Mix               | 355         |
| 13         | ES                | 486         |
| 13         | MI                | 632         |
| 13         | Mix               | 326         |
|            | <b>SUM</b>        | <b>7236</b> |

**Table S2. Total numbers of agonistic encounters according **type encounter** (A = attack, F = fight, H = harassment) and group type (ES = early separated, MI = maternally incubated, Mix = mixed group).**

| <b>Encounter</b> | <b>Group type</b> | <b>N</b>    |
|------------------|-------------------|-------------|
| A                | ES                | 890         |
| A                | MI                | 1080        |
| A                | Mix               | 511         |
| F                | ES                | 669         |
| F                | MI                | 559         |
| F                | Mix               | 459         |
| H                | ES                | 1239        |
| H                | MI                | 950         |
| H                | Mix               | 879         |
|                  | <b>SUM</b>        | <b>7236</b> |
